# Supplementary material
Source: MDPI journal article supplement (https://www.mdpi.com/2674-0389/3/2/15)
Supplement: s1 [file s1]

## Supplementary information

# Fungal Methane Production Controlled by Oxygen Levels and Temperature

Moritz Schroll <sup>1\*</sup>, Katharina Lenhart <sup>2,3</sup>, Thomas Bender <sup>1</sup>, Piet Höttner <sup>1</sup>, Alexander Rudolph <sup>1</sup>, Sven Sörensen <sup>1</sup> and Frank Keppler <sup>1,4\*</sup>

<sup>1</sup> Institute of Earth Sciences, Heidelberg University, 69120 Heidelberg, Germany

<sup>2</sup> Bingen University of Applied Sciences, Berlinstraße 109, Bingen 55411, Germany

<sup>3</sup> Centre for Organismal Studies (COS), Im Neuenheimer Feld 230, 69120 Heidelberg, Germany

<sup>4</sup> Heidelberg Center for the Environment (HCE), Heidelberg University, 69120 Heidelberg, Germany

\* Correspondence: moritz.mchroll@geow.uni-heidelberg.de and frank.keppler@geow.uni-heidelberg.de

### *Text S1. Oxygen and temperature dependency of CO<sub>2</sub> mixing ratios during fungal incubations*

During all fungal incubations, CO<sub>2</sub> mixing ratios within the flasks significantly increased to up to 35% (*L. sulphureus* grown on pine wood at 27°C), indicating the metabolic activity of the investigated fungi (Figure S1). Due to logistic constraints, CO<sub>2</sub> mixing ratios could not be sampled at high resolution as for CH<sub>4</sub> or O<sub>2</sub> mixing ratios. Nonetheless, it was evident that CO<sub>2</sub> mixing ratios increased at a considerably higher rate when O<sub>2</sub> was present in the flasks, compared to conditions where O<sub>2</sub> had been previously consumed by the fungi (e.g., for *P. sapidus* grown on pine wood that showed CO<sub>2</sub> emission rates of 0.39 mmol h<sup>-1</sup> when O<sub>2</sub> was present, while rates accounted for 0.01 mmol h<sup>-1</sup> when O<sub>2</sub> was consumed prior; Figures S1C, F, I). However, CO<sub>2</sub> levels continued to rise even after O<sub>2</sub> depletion, however at a slower rate, suggesting reduced metabolic activity by the fungi (e.g., Figure S1C). This observation aligns with findings from Mukhin and Diyarova [31] which demonstrated that basidiomycetes also emit CO<sub>2</sub> in environments with low to no measurable O<sub>2</sub>.

Temperature also had a noticeable effect on fungal CO<sub>2</sub> emissions. Incubations at 17°C always resulted in smaller CO<sub>2</sub> increases compared to those at 27 or 40°C, regardless of the fungal species or growth medium (e.g., for *P. sapidus* grown on pine wood, where CO<sub>2</sub> emission rates accounted for 0.39 mmol h<sup>-1</sup> and 0.16 mmol h<sup>-1</sup> at temperatures of 27 °C and 17°C, respectively). The difference in the rate of increase in fungal CO<sub>2</sub> emissions was particularly pronounced for *L. sulphureus* grown on pine wood, as opposed to *P. sapidus* grown on the same medium. This suggests that the metabolic activity of *L. sulphureus* was more temperature-dependent than that of *P. sapidus*.

In contrast to fungal incubations, CO<sub>2</sub> mixing ratios of control incubations (explained in more detail in Text S2) showed relatively small increases across different temperatures, indicating that CO<sub>2</sub> emission were closely associated with fungal metabolic activity, similarly as reported by [17,18].

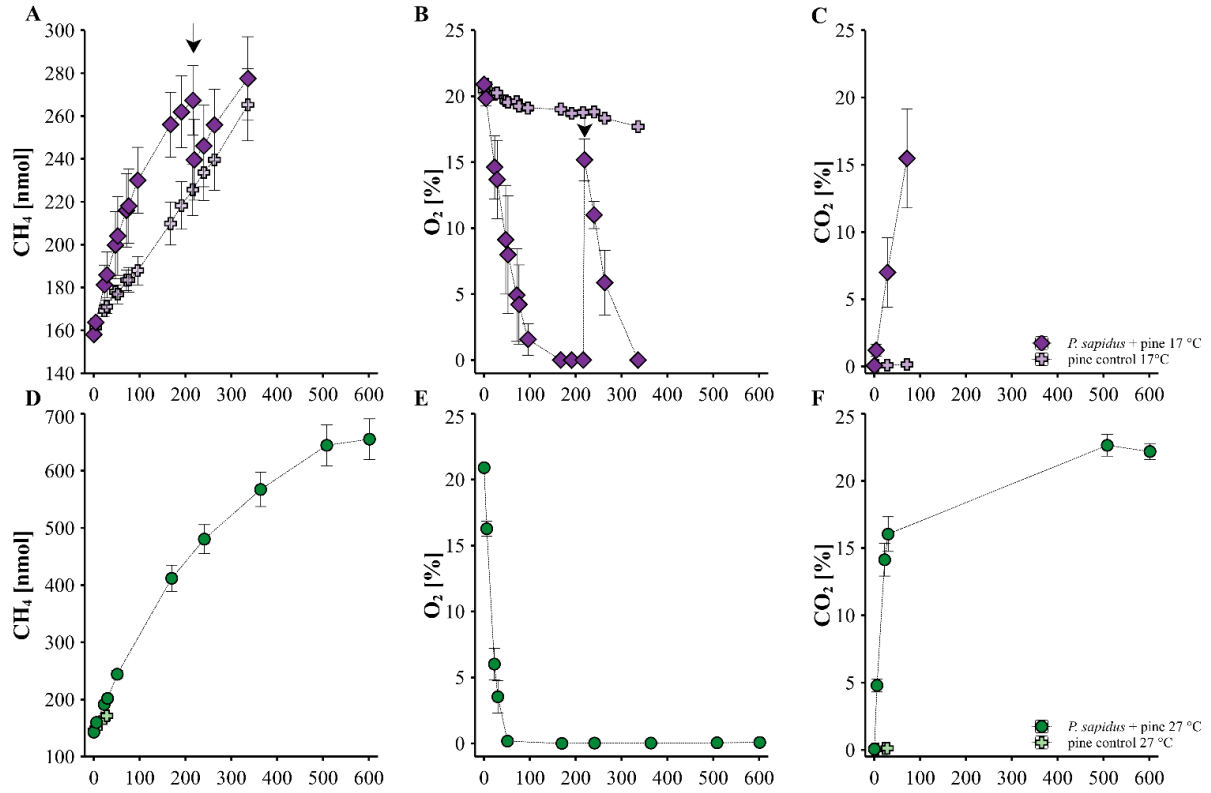

Figure S1: Changes of CH<sub>4</sub> amounts (A, D) as well as O<sub>2</sub> (B, E) and CO<sub>2</sub> levels (C, F), respectively, in the flasks during incubation of *P. sapidus* grown on pine wood at 17 and 27 °C. Black arrows indicate the points of O<sub>2</sub> addition to the individual flasks containing fungi. Data points represent the arithmetic mean and standard deviation of replicate experiments (n = 3 to 4).

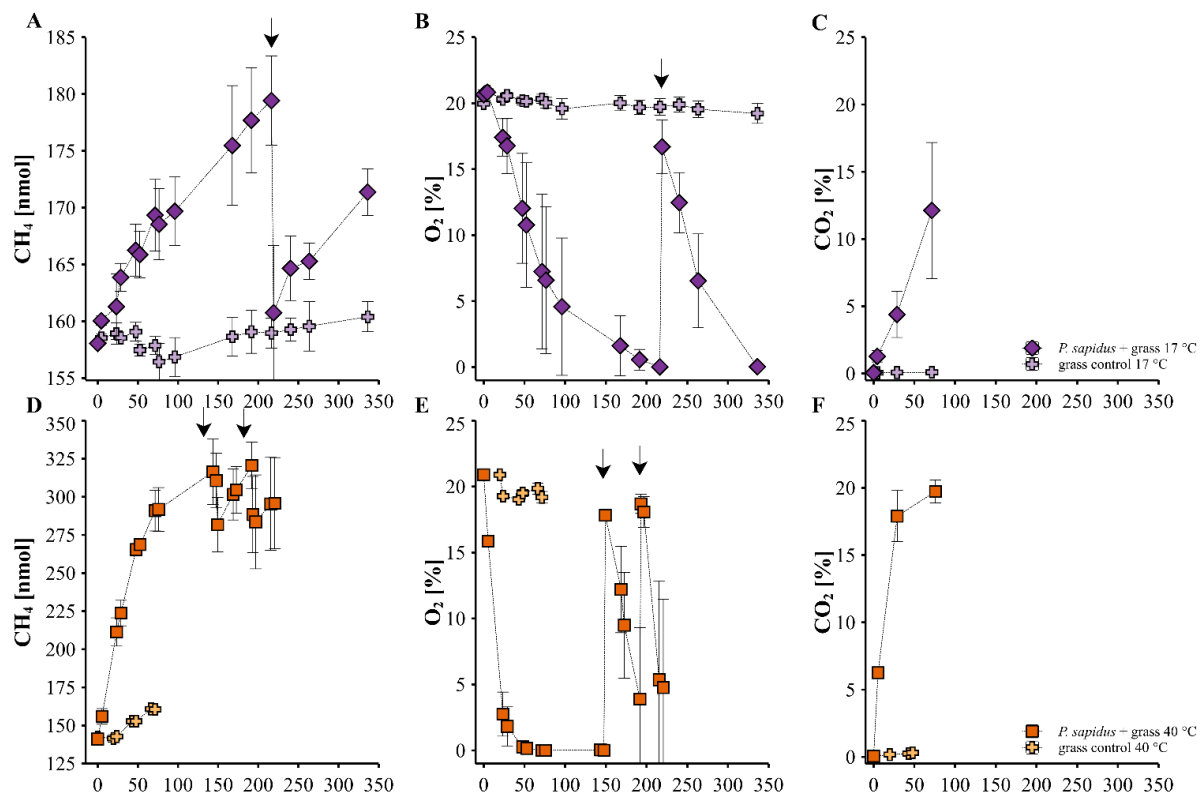

Figure S2: Changes of CH<sub>4</sub> amounts (A, D) as well as O<sub>2</sub> (B, E) and CO<sub>2</sub> levels (C, F), respectively, in the flasks during incubation of *P. sapidus* grown on grass at 17 and 40 °C. Black arrows indicate the points of O<sub>2</sub> addition to the individual flasks containing fungi. Data points represent the arithmetic mean and standard deviation of replicate experiments (n = 3 to 4).

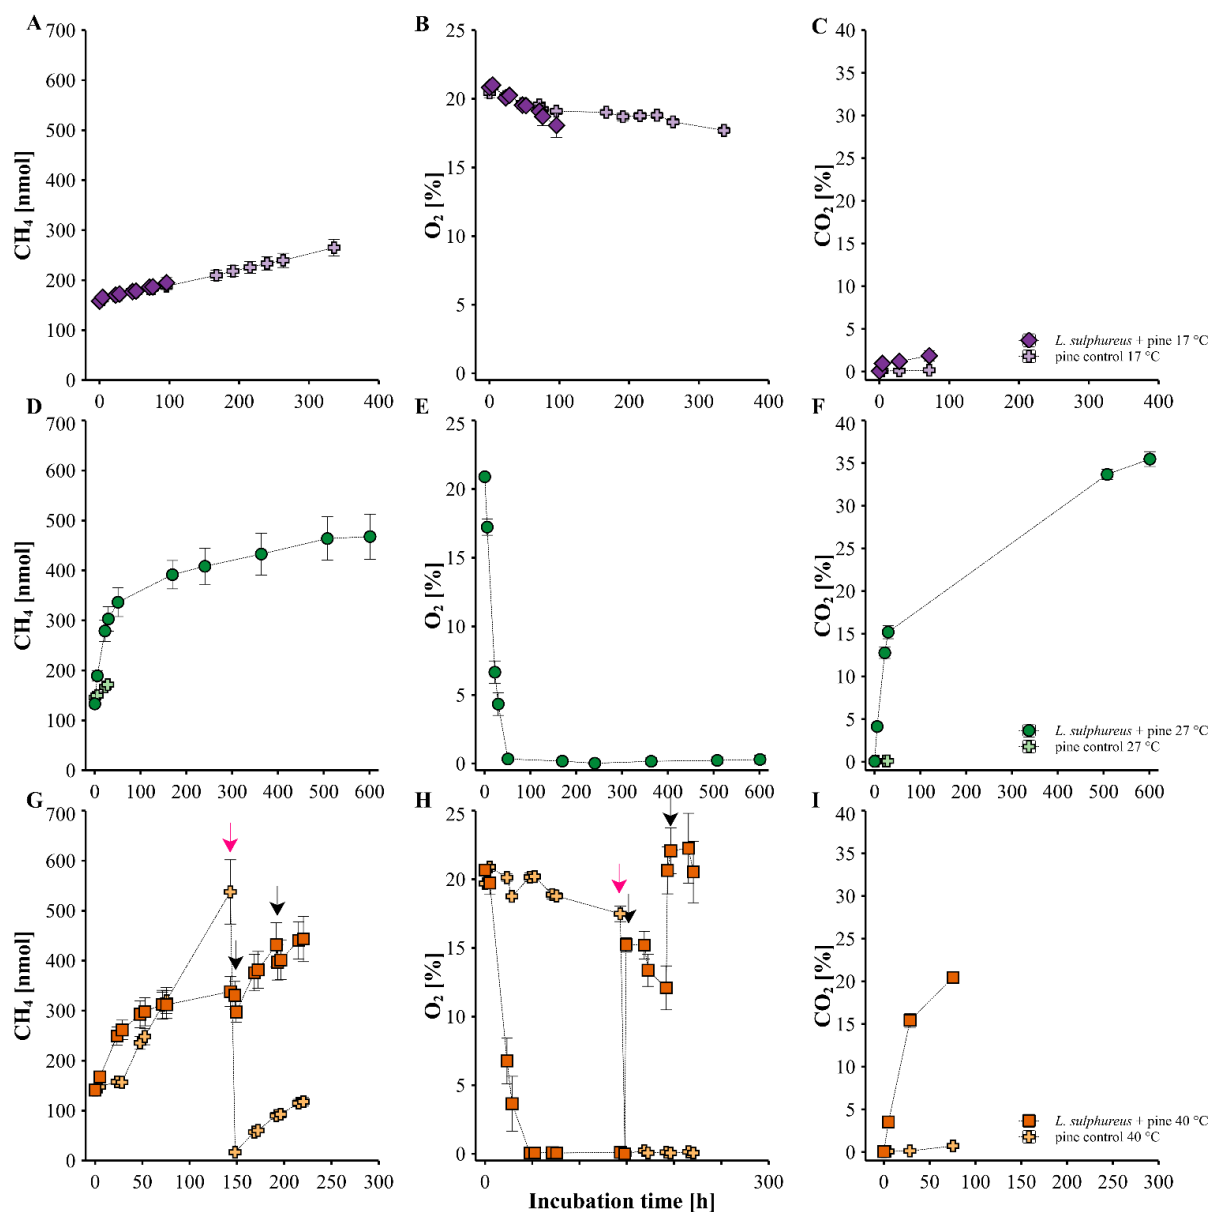

Figure S3: Changes of  $\text{CH}_4$  amounts (A, D, G) as well as  $\text{O}_2$  (B, E, H) and  $\text{CO}_2$  levels (C, F, I), respectively, in the flasks during incubation of *L. sulphureus* grown on pine wood at 17, 27, and 40 °C. Black arrows indicate the points of  $\text{O}_2$  addition to the individual flasks containing fungi, while pink arrows indicate  $\text{O}_2$  removal by flushing of the incubation flask with helium. Data points represent the arithmetic mean and standard deviation of replicate experiments (n = 3 to 4).

*Text S2. Changes in CH<sub>4</sub>, O<sub>2</sub> and CO<sub>2</sub> levels during incubation of pine wood and grass controls*

Figure S2 displays the changes in CH<sub>4</sub> levels, as well as O<sub>2</sub> and CO<sub>2</sub> concentrations, during control incubations of pine wood at 17, 27, and 40°C (A, B, C) and grass at 17°C and 27°C (D, E, F). Both pine wood and grass controls exhibited an increase in CH<sub>4</sub> levels, which increased with temperature. For pine wood controls, the highest CH<sub>4</sub> increase rate was observed at 40°C ( $3.26 \pm 0.53$  nmol h<sup>-1</sup>), surpassing the rates at 27°C ( $0.91 \pm 0.09$  nmol h<sup>-1</sup>) and 17°C ( $0.30 \pm 0.05$  nmol h<sup>-1</sup>). For grass controls a similar trend was observed with higher CH<sub>4</sub> increase rates at 27°C ( $0.31 \pm 0.01$  nmol h<sup>-1</sup>) compared with 17°C ( $0.01$  nmol h<sup>-1</sup>). Although CH<sub>4</sub> levels rose within the flasks, it is noteworthy that increases were 0.5 to 14 times higher in the presence of either of the two fungal species grown on the respective substrates and temperature. Measurements for pine wood controls at 40°C were conducted with and without O<sub>2</sub> (Fig. S2A), with the O<sub>2</sub>-free treatment's headspace being replaced by helium. Notably, CH<sub>4</sub> formation rates in the O<sub>2</sub>-free control were 60% lower than those in the presence of O<sub>2</sub>. The reason for this observation is currently still unclear and should be addressed in future research.

A similar trend was noted for O<sub>2</sub> and CO<sub>2</sub> mixing ratios during the incubation of controls. Oxygen concentrations slightly declined for the pine wood controls, more so at 40°C ( $0.02$  mmol h<sup>-1</sup>) compared with 17°C ( $0.01$  mmol h<sup>-1</sup>), while CO<sub>2</sub> concentrations increased at a higher rate at 40°C ( $0.006$  mmol h<sup>-1</sup>) than at 27°C ( $0.002$  mmol h<sup>-1</sup>) and 17°C ( $0.001$  mmol h<sup>-1</sup>). During the incubation of grass controls only negligible changes in O<sub>2</sub> mixing ratios were observed, while CO<sub>2</sub> increased at a higher rate at 27°C ( $0.003$  mmol h<sup>-1</sup>) compared to 17°C ( $0.0003$  mmol h<sup>-1</sup>). Rates were up to 18 times lower when compared to incubation with fungi for O<sub>2</sub> consumption rates and between 8 to 390 times lower when compared to CO<sub>2</sub> emissions for the respective substrate and fungi. Like in the fungi incubation experiments, the substrates were sterilized before incubation. Thus, the temperature dependent changes in CH<sub>4</sub> levels, along with the much smaller changes in O<sub>2</sub> and CO<sub>2</sub> mixing ratios point to an abiotic formation of CH<sub>4</sub> and CO<sub>2</sub>.

These observations align with findings by Lenhart *et al.* and Schroll *et al.* [17,18], which also reported a small CH<sub>4</sub> production in control media (pine-, spruce-, birch-, beech- and oak wood as well as grass and corn), hinting at a potential abiotic source for this compound. Previous research has linked abiotic CH<sub>4</sub> formation to factors such as UV-B radiation (e.g., [48–50]), temperature [50,51], the presence of H<sub>2</sub>O<sub>2</sub> [52], and iron-oxo catalysis (e.g., [53–55]) through the interaction of ROS and iron (II) in the presence of methylated sulfur and nitrogen compounds. Furthermore, Hädel *et al.* [56] demonstrated that, besides CH<sub>4</sub> and CO<sub>2</sub>, other C<sub>1</sub> and C<sub>2</sub> compounds such as methanol, formate or ethane can be generated from methyl groups in organic matter through iron oxide-mediated methyl radical formation. Nevertheless, the exact mechanisms of the observed abiotic CH<sub>4</sub> formation in our control experiments is currently unknown. This phenomenon demands future investigation, since both the observed abiotic formation of CH<sub>4</sub> and CO<sub>2</sub> as well as potential formation of other C<sub>1</sub> and C<sub>2</sub> compounds could have a strong potential to contribute to the carbon and nitrogen cycle in various environments.

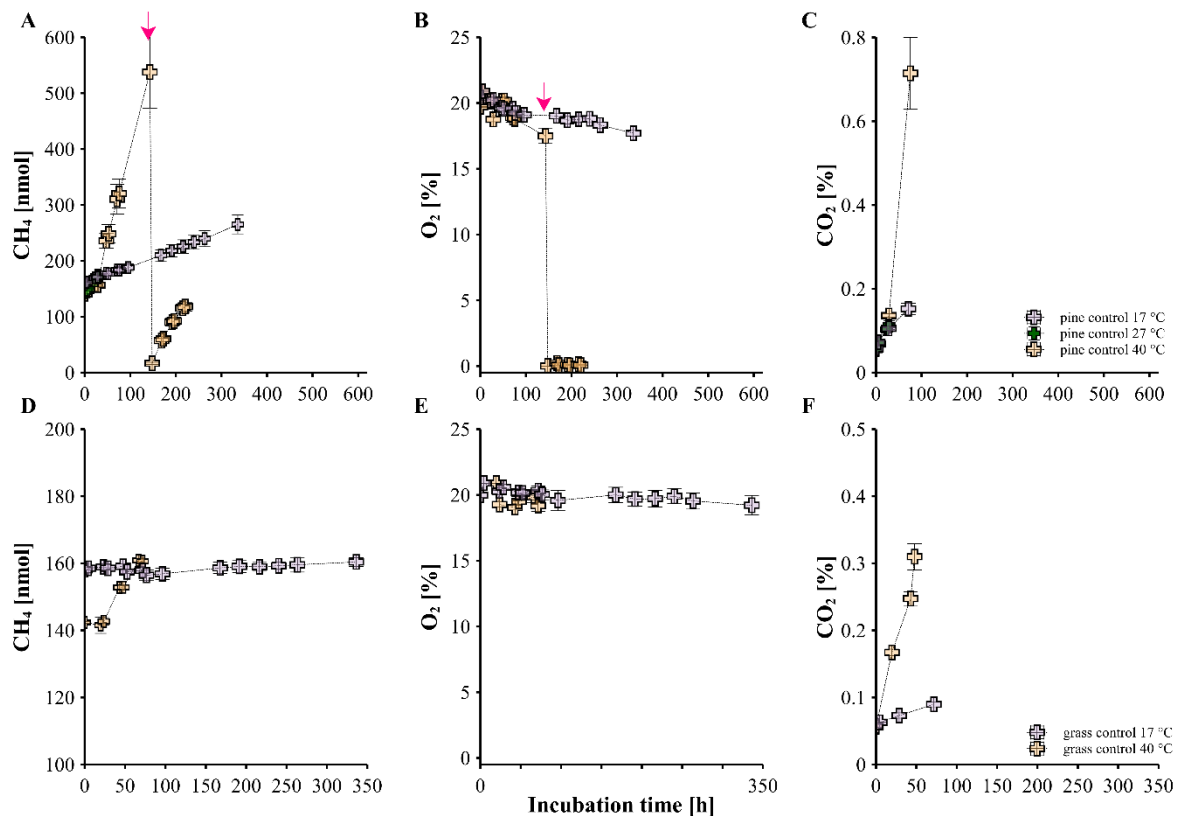

Figure S4: Changes of CH<sub>4</sub> amounts as well as O<sub>2</sub> and CO<sub>2</sub> levels in the flasks during control incubation of A), B), C) pine wood at 17, 27, and 40 °C and D), E), F) grass at 17 and 40 °C. The pink arrow indicates O<sub>2</sub> removal by flushing of the incubation flask with helium. Data points represent the arithmetic mean and standard deviation of replicate experiments (n = 3 to 4).

## References

17. Lenhart, K.; Bunge, M.; Ratering, S.; Neu, T.R.; Schüttmann, I.; Greule, M.; Kammann, C.; Schnell, S.; Müller, C.; Zorn, H.; et al. Evidence for Methane Production by Saprotrophic Fungi. *Nat. Commun.* **2012**, *3*, 1046.
18. Schroll, M.; Keppler, F.; Greule, M.; Eckhardt, C.; Zorn, H.; Lenhart, K. The Stable Carbon Isotope Signature of Methane Produced by Saprotrophic Fungi. *Biogeosciences* **2020**, *17*, 3891–3901.
31. Mukhin, V.A.; Diyarova, D.K. Eco-Physiological Adaptations of the Xylotrophic Basidiomycetes Fungi to CO<sub>2</sub> and O<sub>2</sub> Mode in the Woody Habitat. *JoF* **2022**, *8*, 1296.
48. McLeod, A.R.; Fry, S.C.; Loake, G.J.; Messenger, D.J.; Reay, D.S.; Smith, K.A.; Yun, B. Ultraviolet Radiation Drives Methane Emissions from Terrestrial Plant Pectins. *New Phytol.* **2008**, *180*, 124–132.
49. Vigano, I.; Weelden, H.V.; Holzinger, R.; Keppler, F.; Röckmann, T. Effect of UV Radiation and Temperature on the Emission of Methane from Plant Biomass and Structural Components. *Biogeosciences* **2008**, *5*, 937–947.
50. Ernst, L.; Barayeu, U.; Hädel, J.; Dick, T.P.; Klatt, J.M.; Keppler, F.; Rebele, J.G. Methane Formation Driven by Light and Heat Prior to the Origin of Life and Beyond. *Nat. Commun.* **2023**, *14*, 4364.

51. Keppler, F.; Hamilton, J.T.G.; McRoberts, W.C.; Vigano, I.; Braß, M.; Röckmann, T. Methoxyl Groups of Plant Pectin as a Precursor of Atmospheric Methane: Evidence from Deuterium Labelling Studies. *New Phytol.* **2008**, *178*, 808–814.
52. Althoff, F.; Jugold, A.; Keppler, F. Methane Formation by Oxidation of Ascorbic Acid Using Iron Minerals and Hydrogen Peroxide. *Chemosphere* **2010**, *80*, 286–292.
53. Comba, P.; Kerscher, M.; Krause, T.; Schöler, H.F. Iron-Catalysed Oxidation and Halogenation of Organic Matter in Nature. *Environ. Chem.* **2015**, *12*, 381.
54. Benzing, K.; Comba, P.; Martin, B.; Pokrandt, B.; Keppler, F. Nonheme Iron-Oxo-Catalyzed Methane Formation from Methyl Thioethers: Scope, Mechanism, and Relevance for Natural Systems. *Chem. A Eur. J.* **2017**, *23*, 10465–10472.
55. Althoff, F.; Benzing, K.; Comba, P.; McRoberts, C.; Boyd, D.R.; Greiner, S.; Keppler, F. Abiotic Methanogenesis from Organosulphur Compounds under Ambient Conditions. *Nat. Commun.* **2014**, *5*, 4205.
56. Hädeler, J.; Velmurugan, G.; Lauer, R.; Radhamani, R.; Keppler, F.; Comba, P. Natural Abiotic Iron-Oxide-Mediated Formation of C<sub>1</sub> and C<sub>2</sub> Compounds from Environmentally Important Methyl-Substituted Substrates. *J. Am. Chem. Soc.* **2023**, *145*, 24590–24602.
